# Supplementary material for: Crystal structure of formamidinium–lead–chloride–dimethyl sulfoxide and phase relationship of related crystalline systems
Source: Royal Society of Chemistry journal article supplement (doi:10.1039/d2ce00889k), 2022-01-01
Supplement: d2ce00889k2.pdf [file d2ce00889k2.pdf]

## Supporting information

attached to

### **Crystal structure of formamidinium–lead–chloride–dimethyl sulfoxide and phase relationship of related crystalline systems**

Noriko Saito, Yoshitaka Matsushita, Takeo Ohsawa, Hiroyo Segawa and Naoki Ohashi\*

National Institute for Materials Science (NIMS), 1-1 Namiki, Tsukuba, Ibaraki 305-0044, Japan.

\*Corresponding author: [OHASHI.Naoki@nims.go.jp](mailto:OHASHI.Naoki@nims.go.jp)

### S-1 Structure parameters optimization by DFT total energy calculations

Here, the crystal structure of some compounds calculated in this study are shown in **Tables** from **S-I** to **S-VIII**.

In this study, a plane-wave-based pseudo-potential method implemented in CASTEP code,<sup>1</sup> a part of the Materials Studio Package (Dassault Systèmes, Tokyo, Japan), was adopted for optimization of crystal structures based on the density-functional-theory. The norm-conserved pseudopotentials generated by the CASTEP code was used and a generalized gradient approximation optimized for solids (PBESol)<sup>2</sup> was employed as the exchange-correlation functional for self-consistent total energy calculations. The plane-wave cut-off energy was set to 1050 eV and two sampling points on a Monkhorst–Pack grid<sup>3,4</sup> was involved in total energy calculations. Structural optimization was performed with the Broyden–Fletcher–Goldfarb–Shanno scheme.<sup>5</sup>

For  $\text{PbCl}_2$ ,<sup>6</sup>  $\text{CsCl}$ ,<sup>7</sup>  $\text{DMSO}$ ,<sup>8</sup> and orthorhombic  $\text{CsPbCl}_3$ ,<sup>9</sup> the initial structural models for optimization were constructed refereeing experimentally determined structures. However, some structures, *i.e.*  $\text{FACl}$ , was purely theoretically determined, as any information about crystal structure of this compound could not be found by the authors. A super-cell model was employed for calculation on  $\text{FAPbCl}_3$  crystallized in perovskite-type structure in order to describe disordered orientation of  $\text{FA}^+$ . Particularly, the space group of  $Pccn$  ( $D_{2h}$ ) was applied for the model of  $\text{FAPbCl}_3$  to avoid spontaneous polarization. The initial model for  $\text{CsPbCl}_3$ -DMSO was constructed by simply substituting  $\text{Cs}^+$  ion for  $\text{FA}^+$  ion in  $\text{FAPbCl}_3$ -DMSO lattice experimentally determined in this study.

### S-2 Mulliken charge of elements in $\text{FAPbCl}_3$ -DMSO

The effective charge of elements in  $\text{FAPbCl}_3$ -DMSO was evaluated by Mulliken charge analysis for the structure optimized by DFT calculation. The result of charge analysis is show in **Table S-IX**.

### S-3 Thermal desorption from $\text{FAPbCl}_3$ -DMSO

Decomposition of  $\text{FAPbCl}_3$ -DMSO at elevated temperature was examined by measuring thermal desorption spectrometry (TDS). The samples, crystalline  $\text{FAPbCl}_3$ -DMSO was set in an ultra-high-vacuum chamber equipped with high temperature stage and quadrupole-mass-spectrometer (QMS). The sample was heated with the high temperature stage from room temperature to 150°C with a constant rump rate and the temperature was hold at 150°C. The desorbed elements and molecules were analyzed with QMS.

**Figure S-I** shows TDS signal for  $\text{FAPbCl}_3$ -DMSO, particularly the signal profile for  $m/z=78$  and 80. There are two observed profile and one calculated profile. Here, it was assumed that observed signal at  $m/z=78$  is originated in  $^{12}\text{C}_2^1\text{H}_6^{32}\text{S}^{16}\text{O}$ . As the natural abundance of  $^{32}\text{S}$  and  $^{34}\text{S}$  are 95.029% and 4.218%, respectively, expected signal intensity for  $^{12}\text{C}_2^1\text{H}_6^{34}\text{S}^{16}\text{O}$  (DMSO) can be calculated from the observed signal intensity for  $^{12}\text{C}_2^1\text{H}_6^{32}\text{S}^{16}\text{O}$ . As the observed and calculated signal intensity for  $m/z=80$  were in good agreement, we can safely identify that  $m/z=78$  and 80 are for  $^{12}\text{C}_2^1\text{H}_6^{32}\text{S}^{16}\text{O}$  and  $^{12}\text{C}_2^1\text{H}_6^{34}\text{S}^{16}\text{O}$ . Hence, the TDS signal at  $m/z=80$  can be used for discussion on desorption of DMSO.

**Figure S-II** shows TDS signal for  $\text{FAPbCl}_3$ -DMSO, particularly the signal profile for  $m/z=35$  and 37. Here, it was assumed that  $m/z=35$  and 37 are for  $^{35}\text{Cl}$  and  $^{37}\text{Cl}$ . As natural abundance of  $^{35}\text{Cl}$  and  $^{37}\text{Cl}$  are 75.777% and 24.237%, the profile for  $m/z=35$  can be calculated from the observed profile for  $m/z=37$ . As shown in the figure, the calculated and observed profile for  $m/z=35$  obviously differ at relatively low temperature range. Hence, the difference between observed and calculated signal are also plotted. Here, it has to be noted that the difference between observed and calculated signal for  $m/z=35$  (purple line) looked very similar to the profile for  $m/z=78$  and 80 shown in Fig. S-I. As another possible assignment for  $m/z=35$  is  $^{32}\text{S}^1\text{H}_3$ ,  $^{34}\text{S}^1\text{H}$ , and  $^{32}\text{S}^2\text{H}^1\text{H}$ , the difference profile can be attributed to those surfer hydride fragments. On the other hand, the observed and calculated profile at  $m/z=35$  are in good agreement at higher temperature, the observed profile for  $m/z=37$  was identified to  $^{37}\text{Cl}$ , and that for  $m/z=37$  to S–H fragment at lower temperature and  $^{35}\text{Cl}$  fragment at higher temperature. Hence, the signal at  $m/z=37$  can be regarded as the desorption profile for Cl. The critical difference between Cl and CMSO in terms of TDS profile was that desorption of DMSO was completed at  $T<100^\circ\text{C}$  but Cl continuously desorbed at  $T>100^\circ\text{C}$ . It is presumable that desorption of Cl at  $T>100^\circ\text{C}$  is due to gradual evaporation of  $\text{FAPbCl}_3$  from surface.

**Figure S-III** shows TDS signal for  $\text{FAPbCl}_3$ -DMSO, particularly the signal profile for  $m/z=12$ , 14, 16 and 28. The signal for  $m/z=12$  and 14 at  $T<100^\circ\text{C}$  looked very similar to the signal for DMSO shown in Fig. S-I. Hence, signal at  $m/z=12$  and 14, particularly at  $T<100^\circ\text{C}$  should be identified as  $^{12}\text{C}$  and  $^{12}\text{C}^1\text{H}_2$  originated in desorption of DMSO. However, the behavior of the signal at  $m/z=12$  and 14 was obviously different from that of DMSO ( $m/z=80$ ) at higher temperature,  $T>100^\circ\text{C}$ . As described above, desorption of DMSO was completed at  $T<100^\circ\text{C}$ . However,

signal intensity for  $m/z=12$  and  $14$  decreased very slowly even at  $T>100^\circ\text{C}$ . Hence, origin of the signal at  $m/z=12$  and  $14$  was not DMSO. The long tail behavior at high temperature was commonly seen for the signal at  $m/z=16$  and  $28$ . Further, behaviors of the signal at  $m/z=16$  and  $28$  differ from those of DMSO related fragments. Therefore, it is presumable that  $m/z=16$  and  $28$  were not dominated by desorption of DMSO. Here, it can be assumed that the  $m/z=16$  is for  $^{14}\text{N}^1\text{H}_2$  and  $m/z=28$  for  $^{14}\text{N}_2$  and/or  $^{12}\text{C}_2^1\text{H}_4$ . This identification suggests us that FA is remained in the lattice even at  $T>100^\circ\text{C}$ . As the sample was corrected even after holding at  $T=150^\circ\text{C}$ , gradual desorption of Cl and FA continued at  $T>100^\circ\text{C}$  was from the surface and was not due to decomposition.

**Figure S-IV** shows SEM image of the sample before and after TDS measurement. The crushed  $\text{FAPbCl}_3$ -DMSO crystal (left) was used as specimen for TDS measurement is compared with the residual solid collected after TDS measurement. As mentioned heating in vacuum induced decomposition of  $\text{FAPbCl}_3$ -DMSO by desorption of DMSO. The grains in the residual powder shows porous feature, which was resulting from formation of paths for desorption of DMSO.

## References

1. S. J. Clark, M. D. Segall, C. J. Pickard, P. J. Hasnip, M. I. J. Probert, K. Refson and M. C. Payne, First Principles Methods using CASTEP, *Z. Kristallogr.*, 2005, **220**, 567–570.
2. J. P. Perdew, A. Ruzsinszky, G. I. Csonka, O. A. Vydrov, G. E. Scuseria, L. A. Constantin, X. Zhou and K. Burke, Restoring the Density-Gradient Expansion for Exchange in Solids and Surfaces, *Phys. Rev. Lett.*, 2008, **100**, 136406.
3. H. J. Monkhorst and J. D. Pack, Special Points for Brillouin-Zone Integrations, *Phys. Rev.*, 1976, **B13**, 5188-5192.
4. J. D. Pack and H. J. Monkhorst, "Special Points for Brillouin-Zone Integrations"—a Reply, *Phys. Rev.*, 1977, **B 16**, 1748-1749.
5. B. G. Pfrommer, M. Cote, S. G. Louie and M. L. Cohen, Relaxation of Crystals with the Quasi-Newton Method, *J. Comput. Phys.*, 1997, **131**, 233-2401.
6. M. Lumberras, J. Protas, S. Jebbari, G. J. Dirksen and J. Schoonman, Structure and Ionic Conductivity of Mixed Lead Halides  $\text{PbCl}_{2x}\text{Br}_{2(1-x)}$ . II, *Solid State Ionics*, 1986, **20**, 295-304.
7. M. Sist, K. F. F. Fischer, H. Kasai and B. B. Iversen, Low-Temperature Anharmonicity in Cesium Chloride ( $\text{CsCl}$ ), *Angew Chem Int Ed Engl.*, 2017, **56**, 3625-3629.
8. R. Gajda and A. Katrusiak, Electrostatic Matching versus Close-Packing Molecular Arrangement in Compressed Dimethyl Sulfoxide (DMSO) Polymorphs, *J. Phys. Chem.*, 2009, **B113**, 2436–2442.
9. L. Zhang, L. Wang, K. Wang and B. Zou, Pressure-Induced Structural Evolution and Optical Properties of Metal-Halide Perovskite  $\text{CsPbCl}_3$ , *J. Phys. Chem.*, 2018, **C122**, 15220–15225.

**Table S-I Crystal structure of FAPbCl<sub>3</sub>-DMSO under symmetrical restriction with  $P2_1/c$ .**

| Monoclinic, $P2_1/c$                                                                 |         |                          |         |
|--------------------------------------------------------------------------------------|---------|--------------------------|---------|
| $a = 9.7797 \text{ \AA}$                                                             |         | $\alpha = 90^\circ$      |         |
| $b = 14.0003 \text{ \AA}$                                                            |         | $\beta = 115.2331^\circ$ |         |
| $c = 8.9975 \text{ \AA}$                                                             |         | $\gamma = 90^\circ$      |         |
| Fractional atomic coordinates                                                        |         |                          |         |
|                                                                                      | $x$     | $y$                      | $z$     |
| Pb                                                                                   | 0.16041 | 0.61248                  | 0.61325 |
| S                                                                                    | 0.14901 | 0.38669                  | 0.77283 |
| O                                                                                    | 0.26027 | 0.46832                  | 0.79576 |
| Cl1                                                                                  | 0.46516 | 0.63439                  | 0.74795 |
| Cl2                                                                                  | 0.13419 | 0.46229                  | 0.39167 |
| Cl3                                                                                  | 0.84084 | 0.23046                  | 0.61889 |
| N1                                                                                   | 0.51570 | 0.60185                  | 0.42568 |
| N2                                                                                   | 0.43671 | 0.60330                  | 0.14195 |
| C1                                                                                   | 0.10184 | 0.39755                  | 0.94288 |
| C2                                                                                   | 0.26165 | 0.28150                  | 0.83640 |
| C3                                                                                   | 0.41998 | 0.62457                  | 0.27536 |
| H1A                                                                                  | 0.03088 | 0.33657                  | 0.94313 |
| H1B                                                                                  | 0.03600 | 0.46385                  | 0.92090 |
| H1C                                                                                  | 0.20719 | 0.40126                  | 1.05666 |
| H2A                                                                                  | 0.18597 | 0.22196                  | 0.83181 |
| H2B                                                                                  | 0.35130 | 0.29202                  | 0.96153 |
| H2C                                                                                  | 0.31122 | 0.26759                  | 0.74932 |
| H1N1                                                                                 | 0.61740 | 0.56820                  | 0.45272 |
| H1N2                                                                                 | 0.49167 | 0.61884                  | 0.52418 |
| H2N1                                                                                 | 0.53017 | 0.56648                  | 0.14703 |
| H2N2                                                                                 | 0.35848 | 0.63033                  | 0.03237 |
| H3                                                                                   | 0.31852 | 0.66441                  | 0.26148 |
| Schematic structure                                                                  |         |                          |         |
| 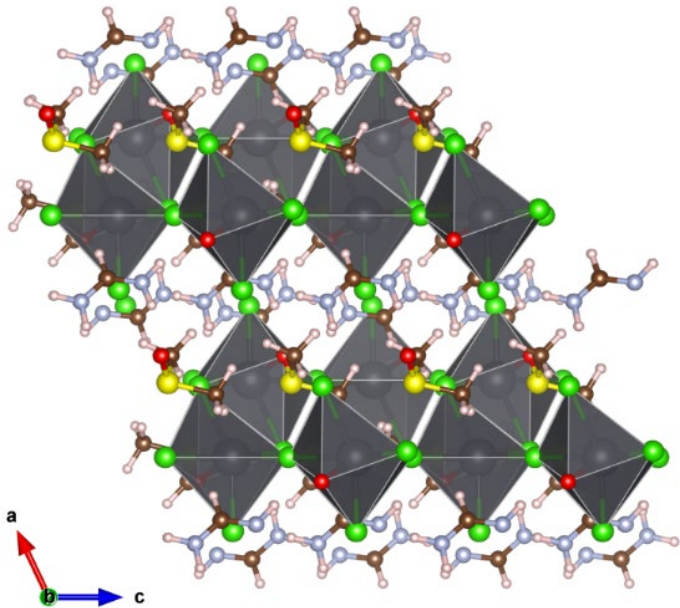 |         |                          |         |

**Table S-II Optimized crystal structure of CsPbCl<sub>3</sub>-DMSO, where Cs<sup>+</sup> was substituted for FA<sup>+</sup> in FAPbCl<sub>3</sub>-DMSO.**

|                               |          |                          |          |
|-------------------------------|----------|--------------------------|----------|
| Triclinic, <i>P1</i>          |          |                          |          |
| $a = 9.5262 \text{ \AA}$      |          | $\alpha = 90.0077^\circ$ |          |
| $b = 14.1760 \text{ \AA}$     |          | $\beta = 114.5148^\circ$ |          |
| $c = 8.3379 \text{ \AA}$      |          | $\gamma = 89.9838^\circ$ |          |
| Fractional atomic coordinates |          |                          |          |
|                               | <i>x</i> | <i>y</i>                 | <i>z</i> |
| Pb1                           | 0.16419  | 0.89226                  | 0.11741  |
| Pb2                           | 0.16401  | 0.60640                  | 0.61724  |
| Pb3                           | -0.16298 | 0.10657                  | 0.88312  |
| Pb4                           | -0.16360 | 0.39220                  | 0.38301  |
| Cs1                           | 0.39490  | 0.89796                  | 0.74847  |
| Cs2                           | 0.60624  | 0.10019                  | 0.25150  |
| Cs3                           | 0.39452  | 0.60025                  | 0.24805  |
| Cs4                           | 0.60613  | 0.39900                  | 0.75184  |
| O1                            | 0.22926  | 0.49301                  | 0.86527  |
| O2                            | -0.22683 | 0.99341                  | 0.63504  |
| O3                            | -0.22897 | 0.50573                  | 0.13536  |
| O4                            | 0.22774  | 0.00539                  | 0.36557  |
| S1                            | 0.13443  | 0.09665                  | 0.31706  |
| S2                            | 0.13554  | 0.40190                  | 0.81698  |
| S3                            | -0.13456 | 0.59656                  | 0.18355  |
| S4                            | -0.13295 | 0.90237                  | 0.68345  |
| Cl1                           | 0.47158  | 0.62886                  | 0.71348  |
| Cl2                           | 0.17734  | 0.43928                  | 0.43756  |
| Cl3                           | -0.16569 | 0.24324                  | 0.63216  |
| Cl4                           | -0.47066 | 0.12775                  | 0.78698  |
| Cl5                           | -0.17630 | 0.93925                  | 0.06242  |
| Cl6                           | 0.16607  | 0.74297                  | 0.86841  |
| Cl7                           | -0.47106 | 0.37042                  | 0.28722  |
| Cl8                           | -0.17628 | 0.55940                  | 0.56306  |
| Cl9                           | 0.16582  | 0.75538                  | 0.36763  |
| Cl10                          | 0.47193  | 0.87033                  | 0.21394  |
| Cl11                          | 0.17813  | 0.05971                  | 0.93862  |
| Cl12                          | -0.16591 | 0.25594                  | 0.13146  |
| C1                            | 0.10415  | 0.37441                  | 1.00797  |
| C2                            | -0.10152 | 0.87490                  | 0.49246  |
| C3                            | -0.26630 | 0.80942                  | 0.66113  |
| C4                            | 0.10209  | 0.12408                  | 0.50748  |
| C5                            | -0.10314 | 0.62355                  | -0.00760 |
| C6                            | -0.26747 | 0.68983                  | 0.16124  |
| C7                            | 0.26908  | 0.30898                  | 0.83945  |
| C8                            | 0.26855  | 0.18930                  | 0.34040  |
| H1                            | 0.21299  | 0.25715                  | 0.34367  |
| H2                            | 0.37166  | 0.17767                  | 0.46452  |
| H3                            | 0.04574  | 0.30568                  | 0.98755  |
| H4                            | 0.02812  | 0.42826                  | 1.02411  |
| H5                            | 0.21623  | 0.37358                  | 0.12355  |
| H7                            | 0.21335  | 0.24126                  | 0.84301  |
| H8                            | 0.37251  | 0.32041                  | 0.96331  |
| H9                            | 0.29395  | 0.31151                  | 0.72211  |
| H10                           | 0.29385  | 0.18657                  | 0.22337  |

|     |          |         |          |
|-----|----------|---------|----------|
| H11 | 0.21372  | 0.12408 | 0.62371  |
| H12 | -0.04333 | 0.80610 | 0.51252  |
| H13 | -0.02535 | 0.92867 | 0.47643  |
| H14 | -0.21361 | 0.87427 | 0.37689  |
| H15 | -0.21029 | 0.74170 | 0.65809  |
| H16 | -0.36965 | 0.82070 | 0.53712  |
| H17 | -0.29133 | 0.81221 | 0.77835  |
| H18 | -0.04367 | 0.69190 | 0.01263  |
| H19 | -0.02809 | 0.56909 | -0.02394 |
| H20 | -0.21532 | 0.62483 | 0.87697  |
| H21 | -0.21134 | 0.75742 | 0.15785  |
| H22 | -0.37098 | 0.67857 | 0.03739  |
| H23 | -0.29235 | 0.68734 | 0.27858  |
| H24 | 0.04475  | 0.19315 | 0.48766  |
| H25 | 0.02484  | 0.07062 | 0.52218  |

Schematic structure

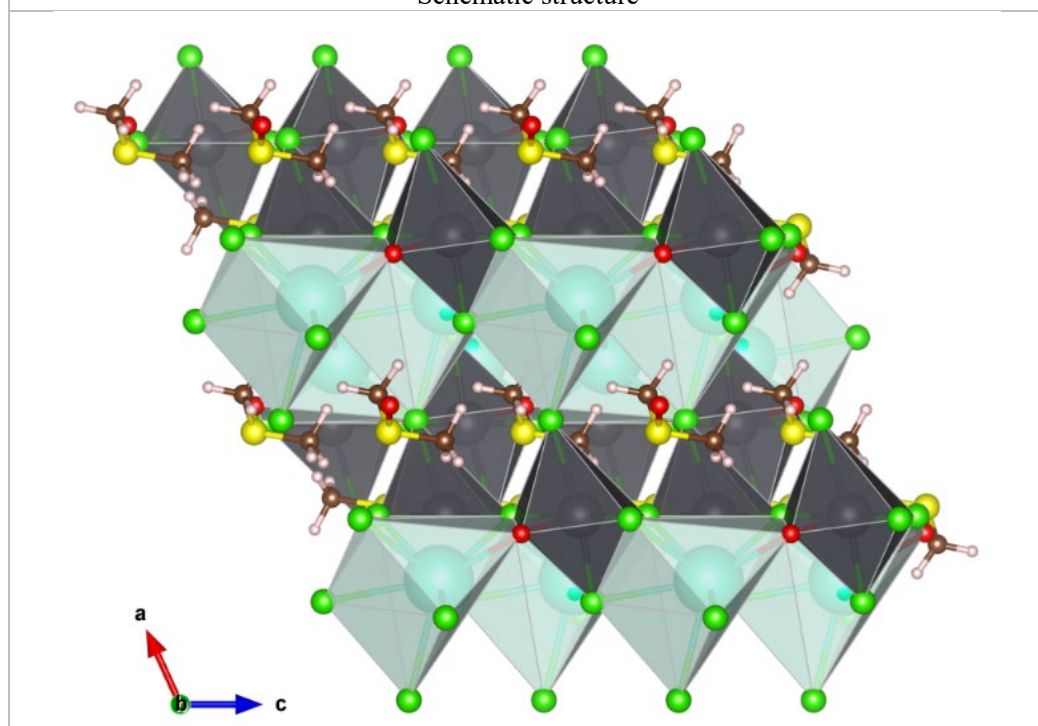

**Table S-III Optimized crystal structure of  $\text{CsPbCl}_3$  crystallized in orthorhombic symmetry.**

|                           |                     |
|---------------------------|---------------------|
| Orthorhombic, $Pbnm$      |                     |
| $a = 7.8565 \text{ \AA}$  | $\alpha = 90^\circ$ |
| $b = 7.9536 \text{ \AA}$  | $\beta = 90^\circ$  |
| $c = 11.0290 \text{ \AA}$ | $\gamma = 90^\circ$ |

Fractional atomic coordinates

|     | $x$     | $y$     | $z$     |
|-----|---------|---------|---------|
| Pb  | 0.50000 | 0.00000 | 0.00000 |
| Cs  | 0.98032 | 0.95097 | 0.25000 |
| Cl1 | 0.10169 | 0.53544 | 0.25000 |
| Cl2 | 0.78432 | 0.21676 | 0.04335 |

Schematic structure

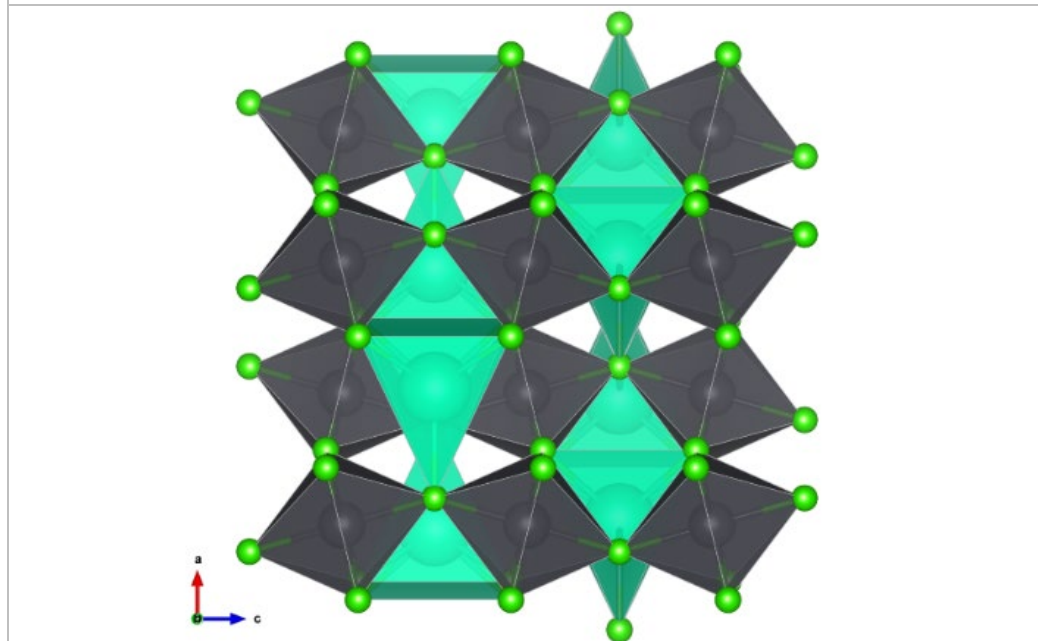

**Table S-IV** Optimized crystal structure of  $\text{FAPbCl}_3$ , super-cell, under structural restriction of  $Pccn$  symmetry to avoid spontaneous polarization.

| Orthorhombic, $Pccn$          |                     |         |          |
|-------------------------------|---------------------|---------|----------|
| $a = 11.7054 \text{ \AA}$     | $\alpha = 90^\circ$ |         |          |
| $b = 11.4073 \text{ \AA}$     | $\beta = 90^\circ$  |         |          |
| $c = 12.4175 \text{ \AA}$     | $\gamma = 90^\circ$ |         |          |
| Fractional atomic coordinates |                     |         |          |
|                               | $x$                 | $y$     | $z$      |
| Pb1                           | 0.25000             | 0.25000 | 0.48049  |
| Pb2                           | -0.25000            | 0.25000 | 0.48900  |
| Cl1                           | 0.25000             | 0.25000 | -0.23638 |
| Cl2                           | 0.00247             | 0.24968 | -0.01175 |
| Cl3                           | 0.23949             | 0.49805 | -0.04501 |
| Cl4                           | -0.25000            | 0.25000 | 0.19433  |
| C                             | -0.48006            | 0.50086 | -0.25167 |
| N1                            | -0.52755            | 0.41277 | -0.30304 |
| N2                            | -0.52174            | 0.54661 | -0.16315 |
| H1                            | -0.48496            | 0.61753 | -0.12603 |
| H2                            | -0.40104            | 0.53720 | -0.28565 |
| H3                            | -0.59869            | 0.51964 | -0.13007 |
| H4                            | -0.49153            | 0.37880 | -0.37175 |
| H5                            | -0.59991            | 0.37166 | -0.27466 |

Schematic structure

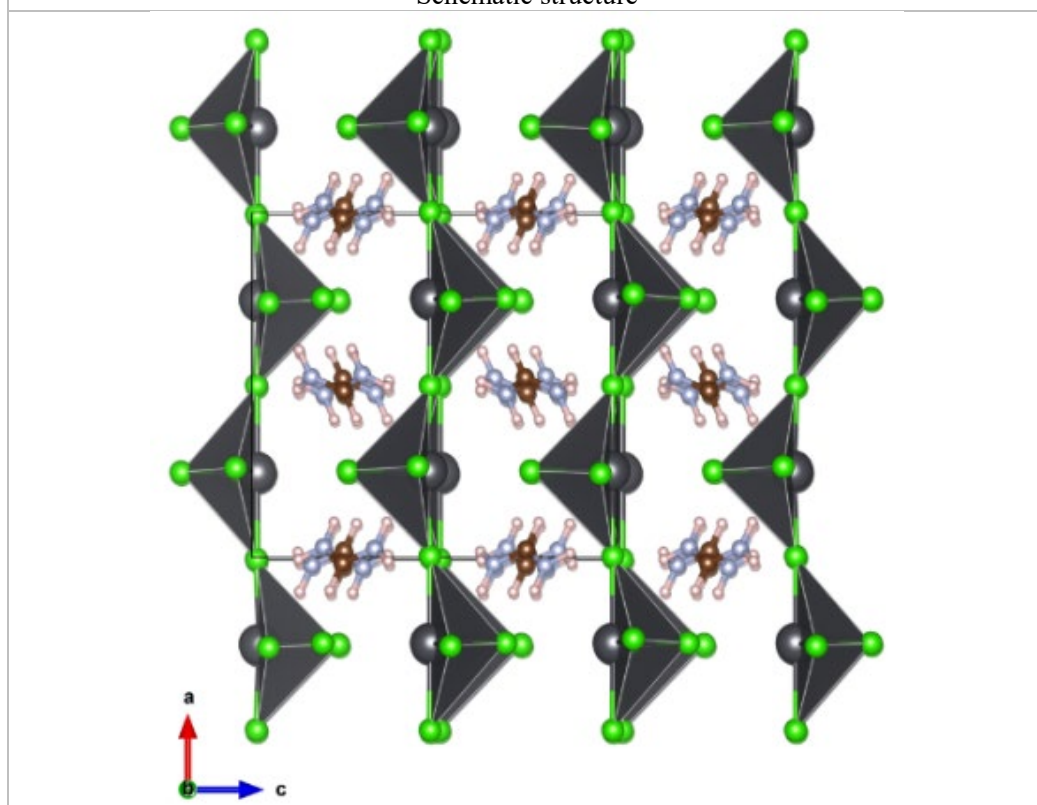



**Table S-V Optimized crystal structure of  $\text{PbCl}_2$ .**

|                                                                                     |                     |          |          |
|-------------------------------------------------------------------------------------|---------------------|----------|----------|
| Orthorhombic, <i>Pnam</i>                                                           |                     |          |          |
| $a = 7.5287 \text{ \AA}$                                                            | $\alpha = 90^\circ$ |          |          |
| $b = 9.0631 \text{ \AA}$                                                            | $\beta = 90^\circ$  |          |          |
| $c = 4.4805 \text{ \AA}$                                                            | $\gamma = 90^\circ$ |          |          |
| Fractional atomic coordinates                                                       |                     |          |          |
|                                                                                     | <i>x</i>            | <i>y</i> | <i>z</i> |
| Cl1                                                                                 | 0.85842             | 0.07895  | 0.25000  |
| Cl2                                                                                 | 0.48318             | 0.84096  | 0.25000  |
| Pb                                                                                  | 0.26279             | 0.09440  | 0.25000  |
| Schematic structure                                                                 |                     |          |          |
| 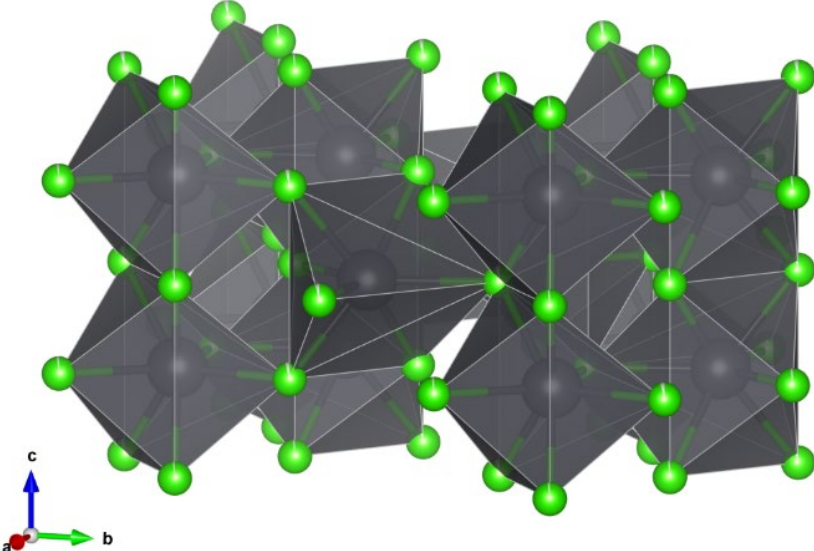 |                     |          |          |

**Table S-VI Optimized crystal structure of CsCl**

|                          |                     |
|--------------------------|---------------------|
| Cubic, $Pm\bar{3}m$      |                     |
| $a = 4.0726 \text{ \AA}$ | $\alpha = 90^\circ$ |
| $b = 4.0726 \text{ \AA}$ | $\beta = 90^\circ$  |
| $c = 4.0726 \text{ \AA}$ | $\gamma = 90^\circ$ |

Fractional atomic coordinates

|    | $x$     | $y$     | $z$     |
|----|---------|---------|---------|
| Cs | 0.00000 | 0.00000 | 0.00000 |
| Cl | 0.50000 | 0.50000 | 0.50000 |

Schematic structure

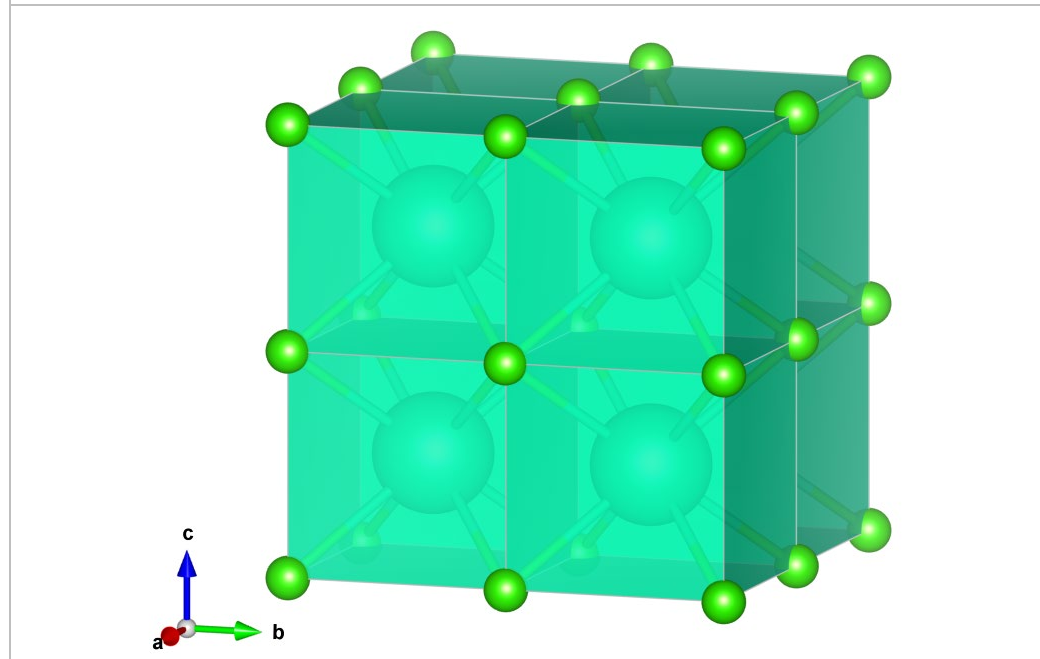

**Table S-VII** Optimized crystal structure of FACL.

|                          |                         |
|--------------------------|-------------------------|
| Monoclinic, $P2_1/c$     |                         |
| $a = 9.6732 \text{ \AA}$ | $\alpha = 90^\circ$     |
| $b = 8.3902 \text{ \AA}$ | $\beta = 45.9126^\circ$ |
| $c = 9.4058 \text{ \AA}$ | $\gamma = 90^\circ$     |

Fractional atomic coordinates

|     | $x$     | $y$     | $z$     |
|-----|---------|---------|---------|
| Cl  | 1.25051 | 0.40686 | 0.16259 |
| C   | 0.67335 | 0.27707 | 0.56568 |
| N1  | 0.80767 | 0.35239 | 0.54157 |
| N2  | 0.48831 | 0.27968 | 0.72661 |
| H1  | 0.71884 | 0.20223 | 0.44321 |
| H1A | 0.95013 | 0.34893 | 0.40719 |
| H1B | 0.77545 | 0.42752 | 0.64960 |
| H2A | 0.39705 | 0.21848 | 0.72351 |
| H2B | 0.42838 | 0.33744 | 0.85679 |

Schematic structure

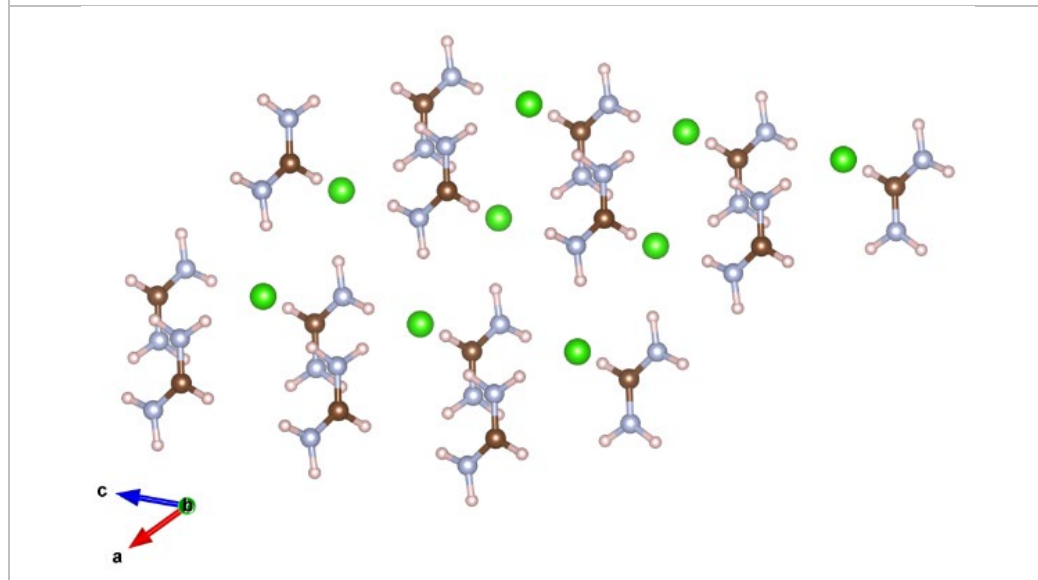

**Table S-VIII Optimized crystal structure of crystalline DMSO.**

| Monoclinic, $P2_1/c$                                                                |          |                         |         |
|-------------------------------------------------------------------------------------|----------|-------------------------|---------|
| $a = 5.2160 \text{ \AA}$                                                            |          | $\alpha = 90^\circ$     |         |
| $b = 7.2517 \text{ \AA}$                                                            |          | $\beta = 94.2831^\circ$ |         |
| $c = 11.3532 \text{ \AA}$                                                           |          | $\gamma = 90^\circ$     |         |
| Fractional atomic coordinates                                                       |          |                         |         |
|                                                                                     | $x$      | $y$                     | $z$     |
| S                                                                                   | 0.32445  | 0.09735                 | 0.29765 |
| O                                                                                   | 0.61174  | 0.09197                 | 0.32298 |
| C1                                                                                  | 0.19417  | -0.09124                | 0.37547 |
| C2                                                                                  | 0.20490  | 0.27933                 | 0.38541 |
| H1A                                                                                 | 0.26824  | -0.08734                | 0.46914 |
| H1B                                                                                 | 0.25229  | -0.21811                | 0.33107 |
| H1C                                                                                 | -0.01695 | -0.07649                | 0.36654 |
| H2A                                                                                 | 0.28368  | 0.26344                 | 0.47752 |
| H2B                                                                                 | 0.26599  | 0.40996                 | 0.34673 |
| H2C                                                                                 | -0.00664 | 0.26906                 | 0.37871 |
| Schematic structure                                                                 |          |                         |         |
| 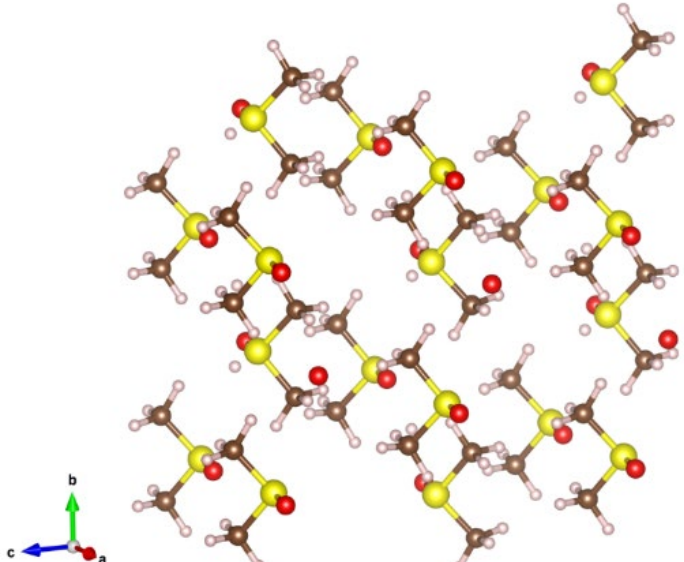 |          |                         |         |

**Table S-IX Mulliken charge of elements in FAPbCl<sub>3</sub>-DMSO**

| Element | Charge / e |
|---------|------------|
| H       | 0.31       |
| C       | -0.54      |
| N       | -0.72      |
| O       | -0.93      |
| S       | 1.12       |
| Cl      | -0.58      |
| Pb      | 1.16       |

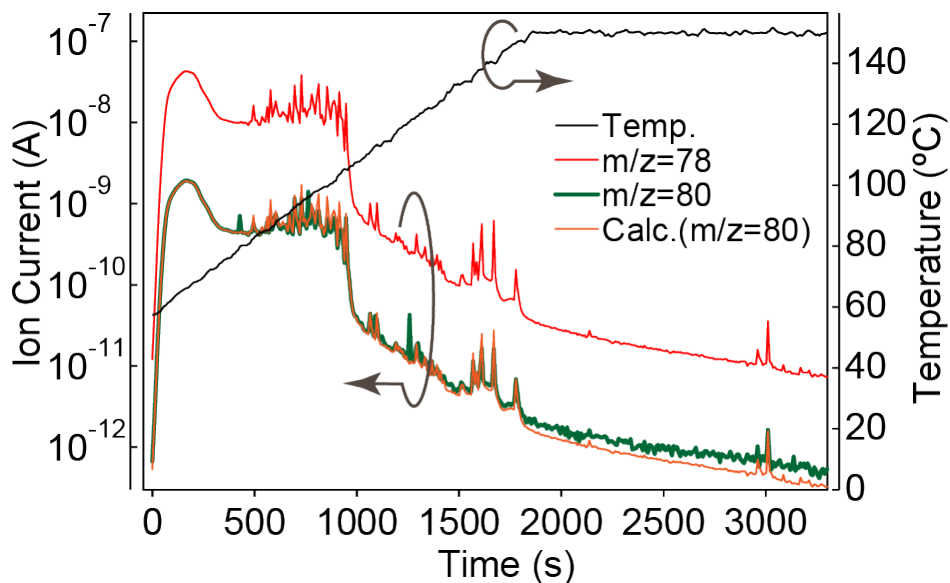

**Figure S-I** TDS profile of  $\text{FAPbCl}_3\text{-DMSO}$ , particularly the fragment with  $m/z=78$  and  $80$ . One of two profiles for  $m/z=80$  was experimentally observed (green line) and the other (red line) was calculated by assuming that observed signal at  $m/z=78$  and calculated signal at  $m/z=80$  correspond to  $^{12}\text{C}_2^1\text{H}_6^{32}\text{S}^{16}\text{O}$  and  $^{12}\text{C}_2^1\text{H}_6^{34}\text{S}^{16}\text{O}$ .

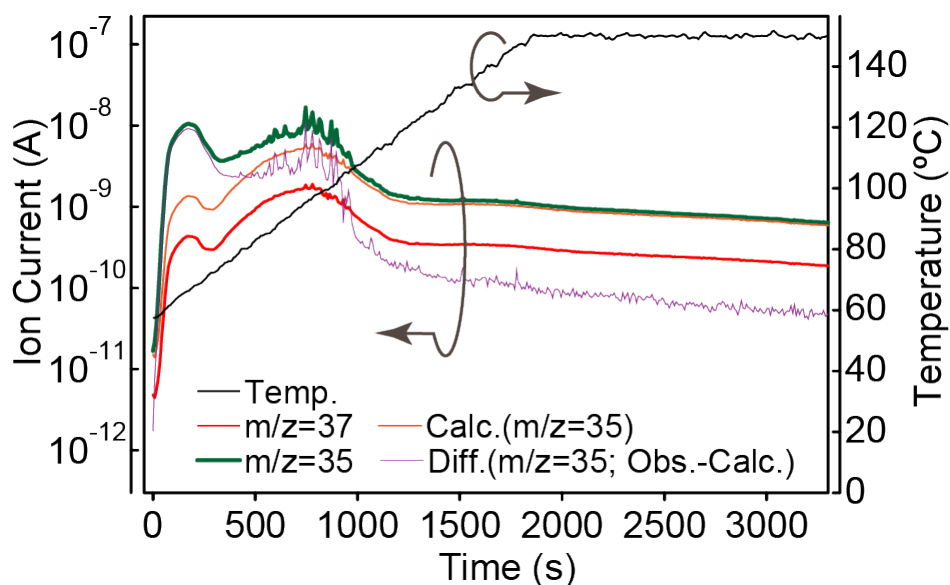

**Figure S-II** TDS profile of  $\text{FAPbCl}_3\text{-DMSO}$ , particularly the fragment with  $m/z=35$  and  $37$ . There are two profiles for  $m/z=35$ . One was observed (green line) and the other (orange line) was calculated by assuming the fragment with  $m/z=35$  and  $37$  were for  $^{35}\text{Cl}$  and  $^{37}\text{Cl}$ . In addition, the difference between observed and calculated profile for  $m/z=35$  (purple line) is shown.

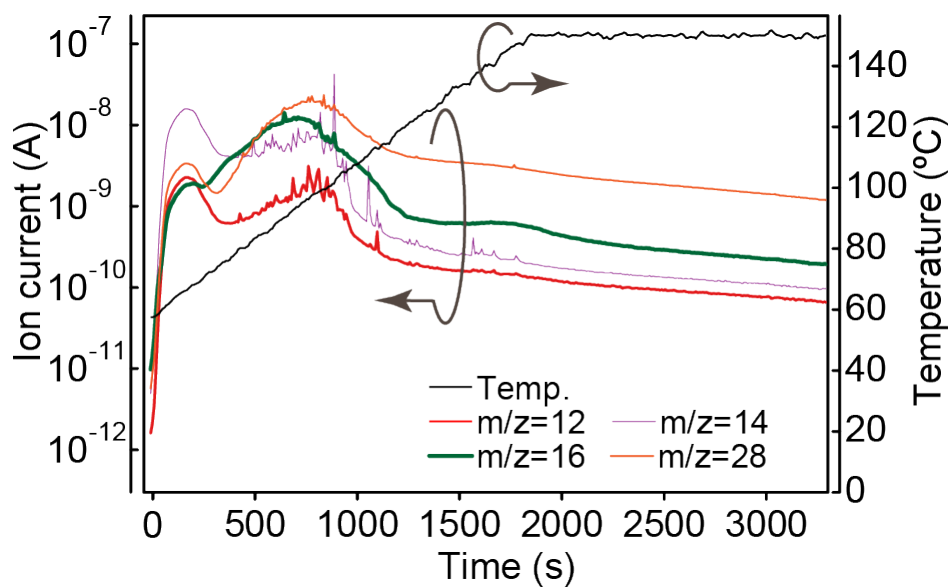

**Figure S-III** TDS profile of  $\text{FAPbCl}_3\text{-DMSO}$ , particularly observed behavior for the fragment with  $m/z=12$ , 14, 16, and 28.

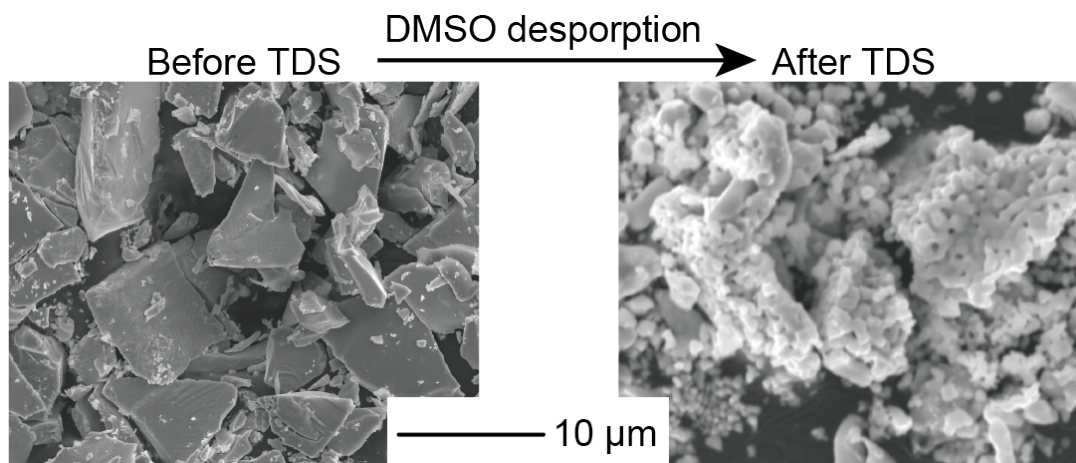

**Figure S-IV** SEM image of crushed  $\text{FAPbCl}_3\text{-DMSO}$  crystal used for TDS measurement (left) and the residual solid after TDS measurement.
